# Supplementary material for: Ru species decoration on hierarchical Nb 2 O 5− x modulates product selectivity for CO 2 photoreduction
Source: Royal Society of Chemistry journal article supplement (doi:10.1039/d5qi01749a), 2025-10-25
Supplement: d5qi01749a1.pdf [file d5qi01749a1.pdf]

## Supplementary Information

1

2

### 3 **Ru species decoration on hierarchical Nb<sub>2</sub>O<sub>5-x</sub> modulates product** 4 **selectivity for CO<sub>2</sub> photoreduction**

5 Yeqiang Zhai, Guimin Wang, Nan Wang, Yanqing Jiao\*, Dongxu Wang,

6 Haijing Yan, Yuxian Jiang, Aiping Wu, and Honggang Fu\*

7

8 Key Laboratory of Functional Inorganic Material Chemistry, Ministry of Education of  
9 the People's Republic of China, National Center for International Research on Catalytic  
10 Technology, Heilongjiang University, Harbin 150080, China

11

12 \*E-mail: fuhg@hlju.edu.cn; fuhg@vip.sina.com; jiaoyanqing@hlju.edu.cn;  
13 jiaoyq617@outlook.com

14

## 1 Experiment details

### 2 Materials and reagents

3 Niobium oxalate ( $C_{10}H_5NbO_{20} \cdot xH_2O$ ), L-arginine ( $C_6H_{14}N_4O_2$ ),  $RuCl_3 \cdot xH_2O$  and  
4 niobium oxide ( $Nb_2O_5$ ) were purchased from Aladdin Reagent Co., Ltd. Citric acid and  
5  $NaBH_4$  were purchased from Tianjin Kemio Chemical Reagent Co., Ltd. Ethanol was  
6 obtained from Tianjin Fuyu Fine Chemical Co., Ltd. All purchased chemicals and  
7 reagents were of analytical grade and used without further purification.

### 8 Preparation of $Nb_2O_{5-x}$

9 1 mmol of  $C_{10}H_5NbO_{20} \cdot xH_2O$  was dissolved in a mixture of 15 mL deionized water  
10 and 10 mL ethanol. The suspension was then heated to 60 °C under magnetic stirring  
11 for 20 min until a clear solution (solution A) was formed. Then, 0.25 mmol of L-  
12 arginine dissolved in 5 mL deionized water was added to solution A, followed by  
13 continued stirring for another 20 min. The resulting mixture was transferred into a 50  
14 mL Teflon-lined autoclave and heated at 180 °C for 12 h, then allowed to cool naturally  
15 to room temperature. After repeated centrifugation and drying at 60 °C, the product was  
16 collected and denoted as the NbO precursor. Finally, the NbO precursor was calcined  
17 in air at 350 °C for 3 h in a muffle furnace, with a heating rate of 10 °C min<sup>-1</sup>. The  
18 resulting yellow solid was denoted as  $Nb_2O_{5-x}$ .

### 19 Preparation of Ov- $Nb_2O_5$

20 Similar to the synthesis of  $Nb_2O_{5-x}$ , 4 mmol of citric acid was used instead of arginine.  
21 The resulting yellow solid was denoted as Ov- $Nb_2O_5$ .

### 22 Preparation of Ru- $Nb_2O_{5-x}$

23 Typically, 1 mL of  $RuCl_3 \cdot xH_2O$  (1 mg mL<sup>-1</sup>) was dispersed into 20 mL of a solution  
24 containing  $Nb_2O_{5-x}$  (25 mg), and stirred for 20 min at room temperature. During the  
25 stirring process, 2 mL of  $NaBH_4$  solution (0.1 M) was added, followed by continuous  
26 stirring for 1 h. The resulting sample was then washed with water and ethanol. After  
27 drying at 60 °C overnight, the final sample, denoted as Ru- $Nb_2O_{5-x}$ , was obtained. The  
28 as-synthesized Ru- $Nb_2O_{5-x}$  photocatalyst exhibited an actual Ru content of 1.02 wt%,

1 as determined by ICP–OES. Furthermore, adjusting the volume of  $\text{RuCl}_3 \cdot x\text{H}_2\text{O}$   
2 solution to 0.25, 0.5, and 2 mL, resulted in actual Ru contents of 0.33, 0.65, and 1.22  
3 wt%, respectively.

## 1 **Characterization**

2 Powder X-ray diffraction (XRD) measurements were performed on a Bruker D8  
3 Advanced diffractometer with nickel-filtered Cu  $K\alpha$  radiation ( $\lambda = 1.5406 \text{ \AA}$ ) at room  
4 temperature. The transmission electron microscope (TEM) measurement of the samples  
5 was explored using a Hitachi S-4800 field emission scanning electron microscope  
6 operating at 15 kV and a JEOL model JEM-F200 transmission electron microscope  
7 with an acceleration voltage of 200 kV. X-ray photoelectron spectra (XPS) were  
8 acquired using a VG ESCALAB MK II spectrometer with a monochromatic Mg  $K\alpha$   
9 source (1253.6 eV). Nitrogen and CO<sub>2</sub> adsorption/desorption measurements were  
10 carried out on a Tristar II 3020 surface area and porosity analyzer (Micromeritics). The  
11 specific surface area was calculated using the Brunauer–Emmett–Teller (BET) method.  
12 Room temperature UV/Vis diffuse reflectance spectra (DRS) were recorded on a  
13 Shimadzu UV–2550 UV/Vis spectrophotometer using BaSO<sub>4</sub> as the reference.  
14 Photoluminescence (PL) spectra of the photocatalysts were recorded on a LS55 Perkin–  
15 Elmer fluorescence spectrophotometer. PL lifetimes were determined using a single  
16 photon counting spectrometer with a microsecond pulse lamp as the excitation source  
17 (350 nm). Time-resolved photoluminescence (TRPL) spectra were also recorded by a  
18 transient fluorescence spectrometer (HORIBA Nanolog) equipped with a low  
19 temperature thermostatic tank as a sample pool in air and in vacuum, by using the  
20 excitation wavelength of 365 nm. Electron paramagnetic resonance (EPR) was tested  
21 using a Bruker EMX plus model spectrometer operated at room temperature. CO<sub>2</sub>/CO  
22 temperature-programmed desorption (CO<sub>2</sub>/CO–TPD) was obtained on a PX200 series  
23 multi-purpose adsorption instrument. Inductively coupled plasma-atomic Omission  
24 spectrometry (ICP–OES) was calculated using the PerkinElmer Optima 7000DV, all  
25 samples to be tested were dissolved in HF solution.

## 26 **Photoelectrochemical measurements**

27 Photoelectrochemical measurements were performed on a electrochemical workstation  
28 system (Princeton Versa STAT) with a conventional three-electrode cell. A Pt plate and  
29 a Ag/AgCl electrode were used as the counter and reference electrode, respectively.

1 The working electrodes were each prepared by coating a fluorine-doped tin oxide (FTO,  
2  $1.0 \times 1.0 \text{ cm}^2$ ) substrate with an as-prepared sample, followed by drying in an oven. A  
3  $0.5 \text{ M Na}_2\text{SO}_4$  aqueous solution (purged with  $\text{N}_2$  for 1 h) was used as the electrolyte.  
4 The light source was a 300 W Xe lamp. Transient photocurrent responses and EIS were  
5 recorded under intermittent visible-light irradiation. Mott–Schottky plots at the  
6 frequencies of 500, 800 and 1000 Hz were obtained using the three-electrode cell with  
7 saturated  $0.5 \text{ M Na}_2\text{SO}_4$  as the electrolyte. Applied potential ( $E$ ) with respect to NHE  
8 was calculated using the following equation:  $E_{\text{NHE}} = E_{\text{Ag/AgCl}} + 0.197$ .

## 9 Photocatalytic experiments

10 The photocatalytic  $\text{CO}_2$  reduction activity was tested in a gas-solid reactor and the  
11 reduction gas phase product was measured out in a CEL-PAEM-D8-Plus closed  
12 circulation system (China Education Au Light, Beijing). 5 mg catalyst was dispersed  
13 into 1 mL ethanol and then the dispersion was spin-dropped uniformly onto a home-  
14 made quartz watch glass. After heating at  $60^\circ\text{C}$  for several min, a thin film was  
15 prepared onto the watch glass homogeneously and placed on a triangle glass rack at the  
16 upper layer of a reactor, adding 10 mL water without any other extra photosensitizer or  
17 sacrificial reagent. A 300 W Xenon lamp (China Education Au Light, Beijing) was  
18 employed as the light source. Before irradiation, the reactor was vacuumed and was  
19 subsequently back filled with 20 mL ultra-pure  $\text{CO}_2$  (99.999%), maintained for 30 min  
20 to a  $\text{CO}_2$  adsorption and desorption equilibrium. The photocatalytic reactor was  
21 connected to an online gas chromatograph for hourly gas collection and analysis. The  
22 gas products were analyzed by a gas chromatograph (GC 7920-TF2A, China Education  
23 Au Light, Beijing) equipped with a flame ionization detector (FID) and a thermal  
24 conductivity detector (TCD). The quantification of all gases was performed based on  
25 calibration curves established using the corresponding standard gases.  
26 Chromatographic Standard Curves for Gas Detection: Standard curves for each product  
27 were established by manually injecting standard gases ( $\text{CO}$  and  $\text{CH}_4$ ) in volumes of 1,  
28 3, 5, 7, and 9  $\mu\text{L}$  into the system three times. The average peak area from these three  
29 injections was utilized to construct the standard curves.

1 The product selectivity for CO<sub>2</sub> reduction to CO has been calculated using the  
2 following equation: Product selectivity of CO (%) =  $[n(\text{CO})] / [n(\text{CO}) + n(\text{CH}_4)] \times$   
3 100%, where n(CO) and n(CH<sub>4</sub>) are the amounts of produced CO and CH<sub>4</sub>.

4 The following control experiments were performed alongside the photocatalytic test:  
5 (1) without a light source, (2) without the photocatalyst, (3) without water, and (4) with  
6 high-purity Ar replacing CO<sub>2</sub>. No photocatalytic products were detectable in any of  
7 these control experiments. Control experiments were essential to rule out any  
8 background contribution from the experimental system, solvent, or catalyst. The above  
9 tests confirm that the products unequivocally originated from CO<sub>2</sub> photoreduction, and  
10 not from carbon-based impurities in this system.

11 The photocatalytic water splitting performance was tested under solid-liquid reaction  
12 conditions. An on-line photocatalytic activity evaluation system (μGAS1000, Beijing  
13 Perfectlight) was used, which was connected with an on-line gas chromatograph  
14 (GC456i, Scion, Tschcomp), argon as carrier gas. The photocatalytic overall water  
15 splitting performance was evaluated by dispersing 5 mg of photocatalyst in 30 mL of  
16 distilled water. No sacrificial agents or co-catalysts were added. Prior to the reaction,  
17 the reaction system was evacuated to remove air from the reaction system and dissolved  
18 air from the water. The irradiation was carried out using a 300 W Xenon lamp.

## 19 **Determination of H<sub>2</sub>O<sub>2</sub> concentration**

20 The production of H<sub>2</sub>O<sub>2</sub> was analyzed by the iodometry. 1 mL 0.1 mol L<sup>-1</sup> potassium  
21 hydrogen phthalate (C<sub>8</sub>H<sub>5</sub>KO<sub>4</sub>) aqueous solution and 1 mL 0.4 mol L<sup>-1</sup> potassium iodide  
22 (KI) aqueous solution was added into the H<sub>2</sub>O<sub>2</sub>, which was hold for 30 min. The H<sub>2</sub>O<sub>2</sub>  
23 molecules react with iodide anions under acidic condition to give triiodide anions which  
24 show a strong adsorption at around 350 nm. The concentration of triiodide anion was  
25 detected by UV-vis spectroscopy. A standard solution was prepared by diluting  
26 hydrogen peroxide 500-fold. Subsequently, aliquots of 6, 7, 8, and 10 μL of this diluted  
27 solution were taken to establish the calibration curve for estimating the the quantity of  
28 produced H<sub>2</sub>O<sub>2</sub>.

29

## 1 **In situ diffuse reflectance infrared Fourier transform spectroscopy**

2 *In-situ* diffuse reflectance infrared Fourier transform spectroscopy (DRIFTS) was  
3 measured by a Thermo Scientific iS50 FTIR spectrometer, with 64 scans accumulated  
4 at a resolution of 8 cm<sup>-1</sup>. Prior to the measurement, the samples were flushed with Ar  
5 with a gas-flow rate of 30 mL·min<sup>-1</sup> for 30 min. Then, the cell needs to be under  
6 conditions containing distilled water and then vacuumed to remove the gas. Besides, 1  
7 MPa of CO<sub>2</sub> was introduced into the cell with a gas flow rate of 30 mL min<sup>-1</sup> for 30 min  
8 and stabilized. Then, it was recorded and saved as background spectrum. After 30 min  
9 dark adsorption, turned on the lamp for illumination. At last, the DRIFTS of samples  
10 under irradiation were recorded for 60 min.

11

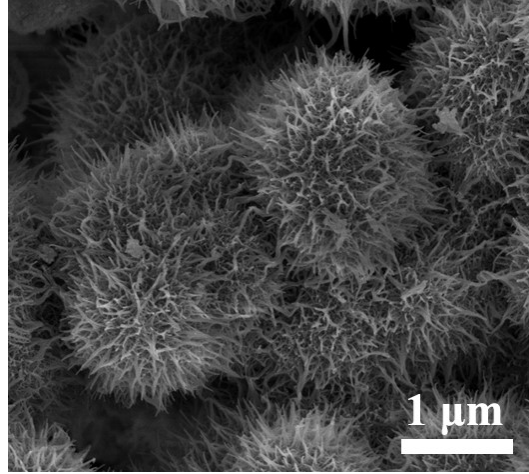

**Fig. S1.** SEM of the NbO precursor.

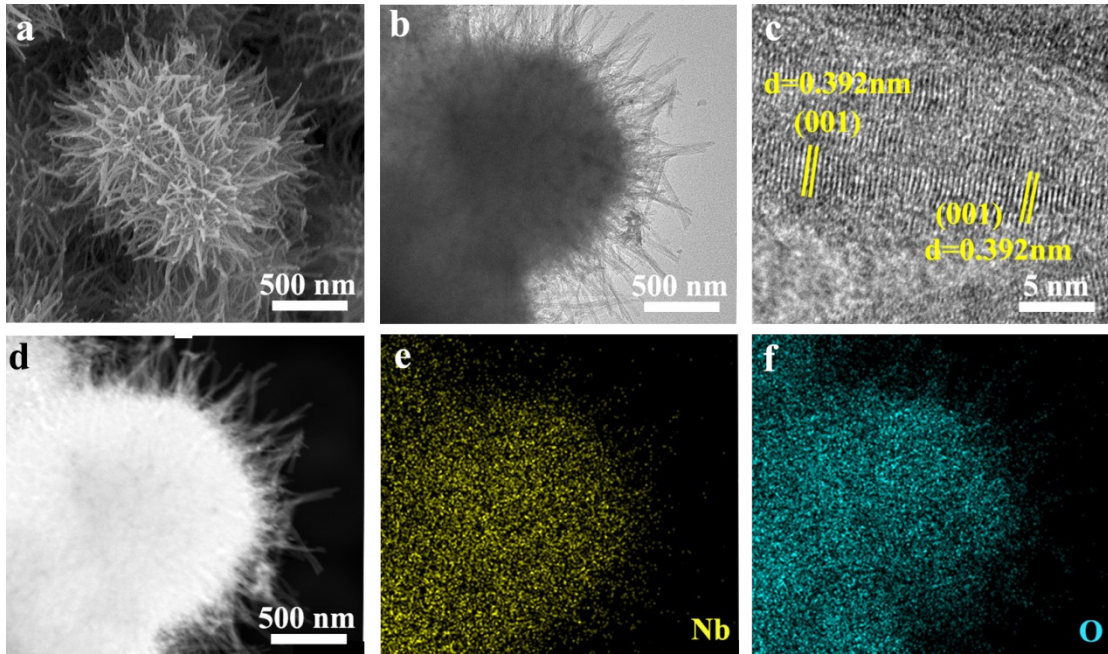

**Fig. S2.** (a) SEM, (b) TEM, and (c) HRTEM images, (d) STEM image and the corresponding EDX elemental mappings of (e) Nb and (e) O for  $\text{Nb}_2\text{O}_{5-x}$ .



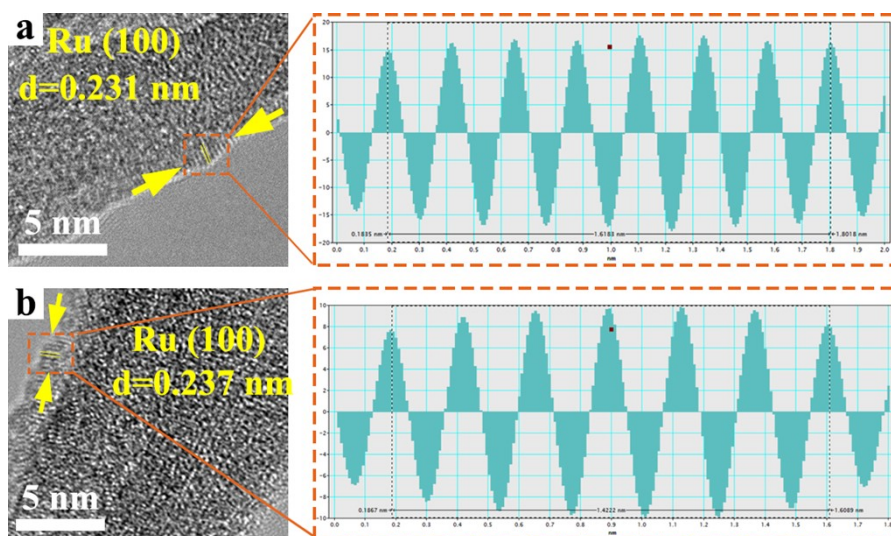

**Fig. S3.** (a, b) HRTEM images and the corresponding lattice fringes of Ru-Nb<sub>2</sub>O<sub>5-x</sub> in different regions.

Notably, lattice fringes with an interplanar spacing of 0.231 and 0.237 nm were observed on the outer surface of the nanothorns in Ru-Nb<sub>2</sub>O<sub>5-x</sub>, which can be attributed to the (100) plane of metallic Ru, confirming the presence of Ru<sup>0</sup> species.

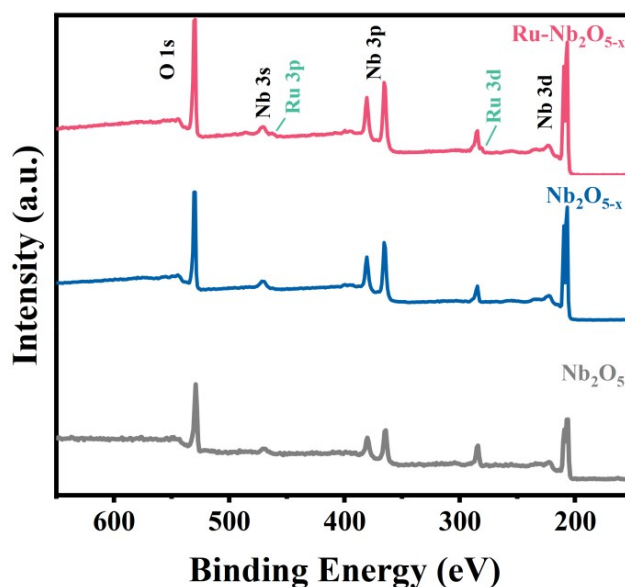

**Fig. S4.** XPS survey spectra of the Ru-Nb<sub>2</sub>O<sub>5-x</sub>, Nb<sub>2</sub>O<sub>5-x</sub> and Nb<sub>2</sub>O<sub>5</sub>.

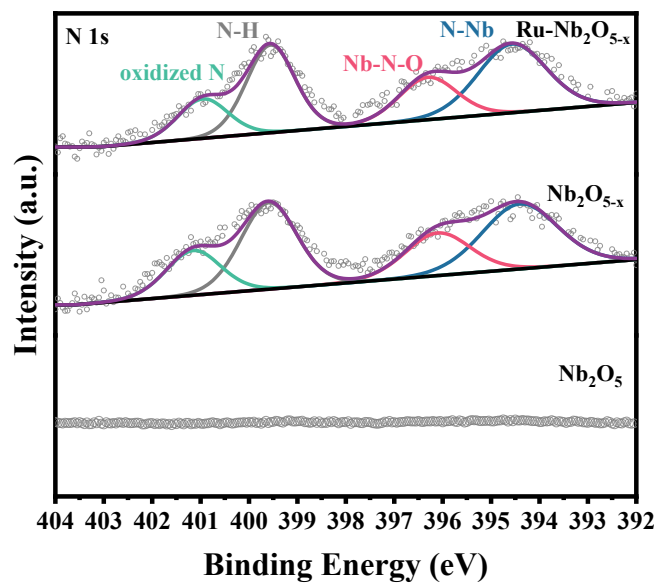

**Fig. S5.** High-resolution XPS spectra of N 1s for Ru-Nb<sub>2</sub>O<sub>5-x</sub>, Nb<sub>2</sub>O<sub>5-x</sub> and Nb<sub>2</sub>O<sub>5</sub>.

As shown in Fig. S5, the N 1s spectra can be deconvoluted into four signals at 394.41, 396.33, 399.56, and 400.94 eV, corresponding to N–Nb (substitutional N-doping), Nb–N–O (interstitial N-doping), N–H, and oxidized N, respectively.

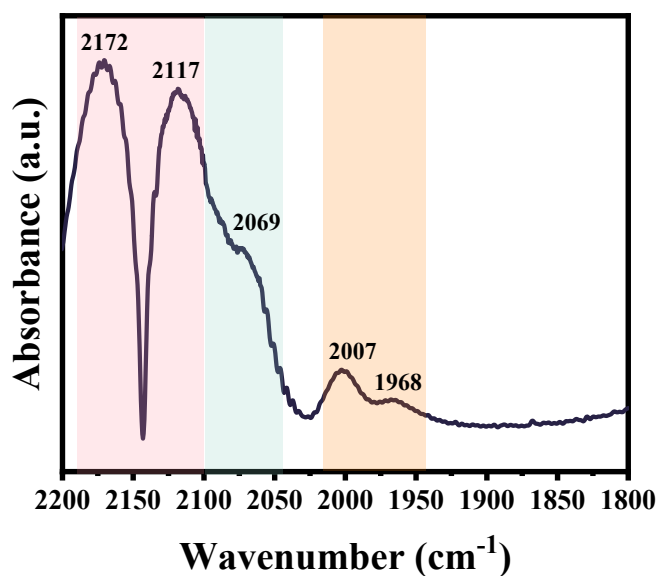

**Fig. S6.** CO-DRIFTS for the Ru-Nb<sub>2</sub>O<sub>5-x</sub>.

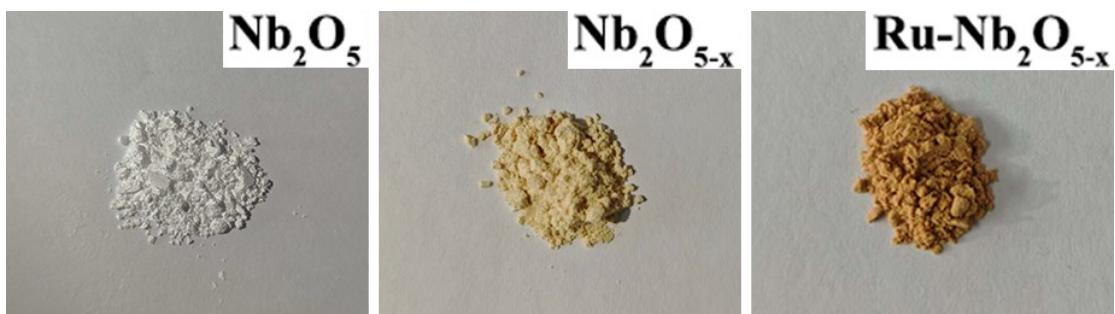

**Fig. S7.** The sample color of  $\text{Nb}_2\text{O}_5$  (white),  $\text{Nb}_2\text{O}_{5-x}$  (yellow) and  $\text{Ru-Nb}_2\text{O}_{5-x}$  (brown).

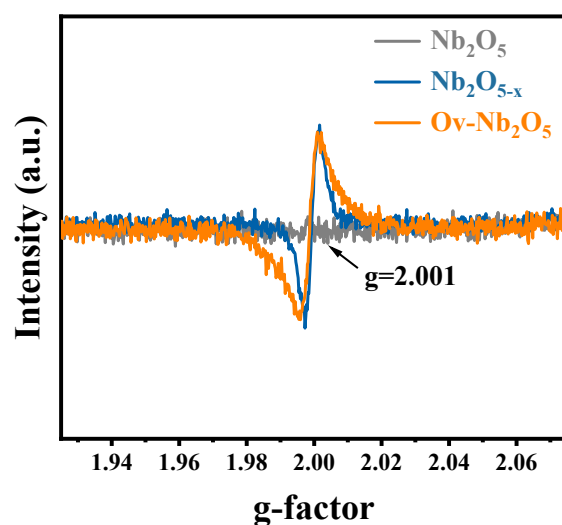

**Fig. S8.** EPR spectra of  $\text{Nb}_2\text{O}_5$ ,  $\text{Nb}_2\text{O}_{5-x}$  and  $\text{Ov-Nb}_2\text{O}_5$ .

To explore the individual roles of N-doping and  $\text{O}_V$ , a reference sample  $\text{Nb}_2\text{O}_5$  that contains only  $\text{O}_V$  without N species (denoted as  $\text{Ov-Nb}_2\text{O}_5$ ) was synthesized using citric acid instead of arginine as the precursor, thereby excluding the nitrogen source. Initially, EPR spectroscopy was employed to confirm the presence and evaluate the concentration of  $\text{O}_V$  in the sample. As shown in Fig. S8, both  $\text{Ov-Nb}_2\text{O}_5$  and  $\text{Nb}_2\text{O}_{5-x}$  exhibit a characteristic EPR signal at a g value of 2.001, which is attributed to unpaired electrons associated with  $\text{O}_V$ . Moreover, the comparable signal intensities indicate that both samples possess a similar concentration of  $\text{O}_V$ .

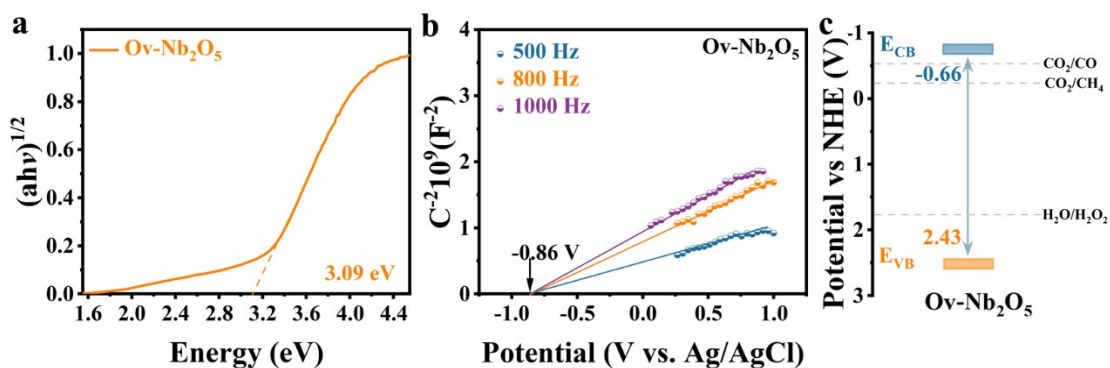

**Fig. S9.** (a) The Tauc plot, (b) Mott-Schottky plots and (c) Schematic energy band structure of Ov-Nb<sub>2</sub>O<sub>5</sub>.

UV-visible diffuse reflectance spectroscopy and Mott-Schottky tests were further carried out to determine the band structure. As shown in Fig. S9a, the corresponding bandgap energy of Ov-Nb<sub>2</sub>O<sub>5</sub> are 3.09 eV, respectively. The slightly narrower bandgap of Ov-Nb<sub>2</sub>O<sub>5</sub> compared with Nb<sub>2</sub>O<sub>5</sub> (3.17 eV) indicates that Ov contributes to bandgap narrowing, whereas its larger bandgap relative to Nb<sub>2</sub>O<sub>5-x</sub> (2.88 eV) suggests that N-doping plays a crucial role in further modulating the electronic structure. Based on the flat band potential of Ov-Nb<sub>2</sub>O<sub>5</sub> measured to be -0.86 V vs. Ag/AgCl (Fig. S9b), the band alignment of Ov-Nb<sub>2</sub>O<sub>5</sub> is depicted, with the conduction and valence band positions at -0.66 and +2.43 V, respectively (Fig. S9c). By comparison, it is evident that N-doping significantly affects the position of the valence band, likely due to N-doping creating new electronic states and modulating the local electronic environment, which results in an upward shift of the valence band maximum. In summary, the Ov and N-doping exert a synergistic effect on the electronic structure of Nb<sub>2</sub>O<sub>5</sub>, thereby effectively reforming the band structure.

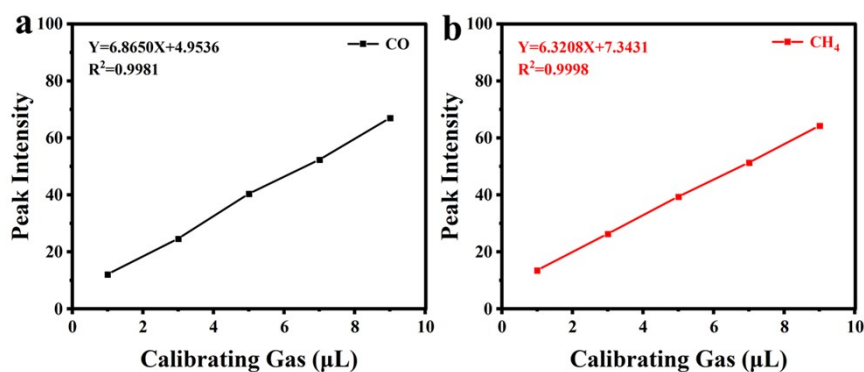

**Fig. S10.** Standard curves for CO (a) and CH<sub>4</sub> (b) on the FID detector.

The specific standard curves and their corresponding  $R^2$  values are as shown in Fig. S10: X denotes the volume of the injected standard gas, while Y represents to the corresponding peak area.

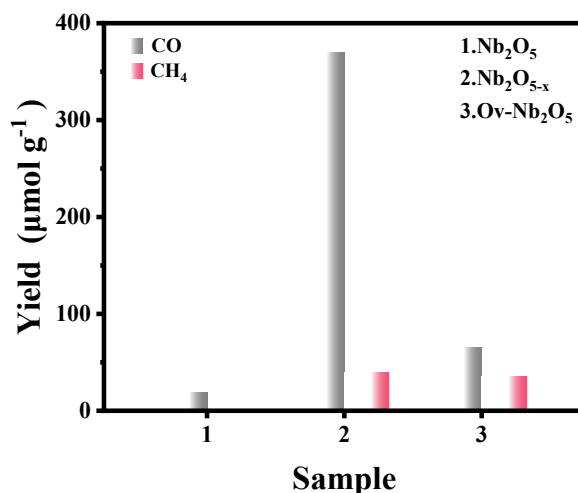

**Fig. S11.** The photocatalytic CO<sub>2</sub> reduction activities of Nb<sub>2</sub>O<sub>5</sub>, Nb<sub>2</sub>O<sub>5-x</sub> and Ov-Nb<sub>2</sub>O<sub>5</sub> during 4 h.

As shown in Fig. S11, after 4 h of illumination, CO is the only product detected over pristine Nb<sub>2</sub>O<sub>5</sub> (18.8 μmol g<sup>-1</sup>). While, Ov-Nb<sub>2</sub>O<sub>5</sub> exhibits markedly enhanced activity, producing 65.2 μmol g<sup>-1</sup> of CO and 35.2 μmol g<sup>-1</sup> of CH<sub>4</sub>. The CO yield over Ov-Nb<sub>2</sub>O<sub>5</sub> is 3.5 times higher than that of pristine Nb<sub>2</sub>O<sub>5</sub>, which can be entirely attributed to the contribution of Ov. In sharp contrast, the Nb<sub>2</sub>O<sub>5-x</sub> sample shows significantly enhanced CO<sub>2</sub> reduction performance, which mainly produced CO (369.4 μmol g<sup>-1</sup>) accompanied by a small amount of CH<sub>4</sub> (39.1 μmol g<sup>-1</sup>). For Nb<sub>2</sub>O<sub>5-x</sub>, the CO yield is 5.7 times higher than that of Ov-Nb<sub>2</sub>O<sub>5</sub>, reflecting the significant effect of N-doping. Taken together, these results indicate that the enhanced CO<sub>2</sub> photoreduction performance of Nb<sub>2</sub>O<sub>5-x</sub> arises from the synergistic effect of Ov and N-doping, with the latter playing a key role in modulating the electronic structure.

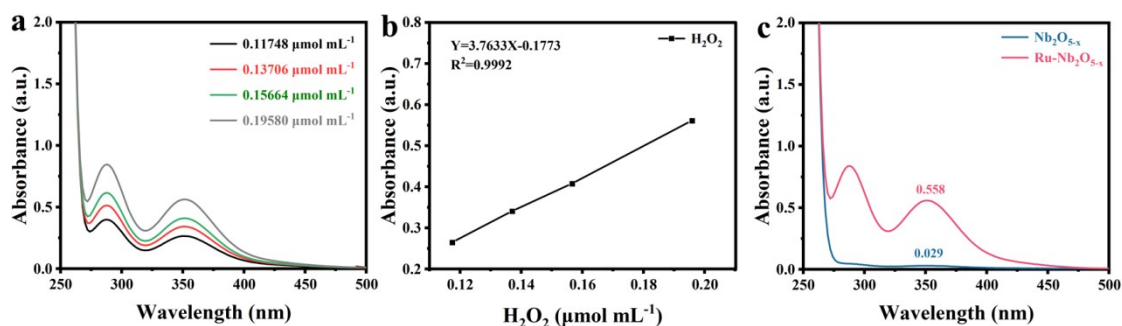

**Fig. S12.** (a-b) Standard curve for the measurement of  $\text{H}_2\text{O}_2$  and (c) UV-vis spectra for detecting generated  $\text{H}_2\text{O}_2$  over  $\text{Nb}_2\text{O}_{5-x}$  and  $\text{Ru-Nb}_2\text{O}_{5-x}$ .

As shown in Fig. S12, iodometric analysis of the hydrogen peroxide produced over  $\text{Nb}_2\text{O}_{5-x}$  and  $\text{Ru-Nb}_2\text{O}_{5-x}$  gave absorbance values of 0.558 and 0.029, respectively. According to the standard calibration curve, the corresponding  $\text{H}_2\text{O}_2$  yields were calculated to be 1.582 and 0.444  $\mu\text{mol}$ , respectively. The significantly higher yield obtained with  $\text{Ru-Nb}_2\text{O}_{5-x}$  corroborates that the incorporation of Ru species effectively promotes water oxidation.

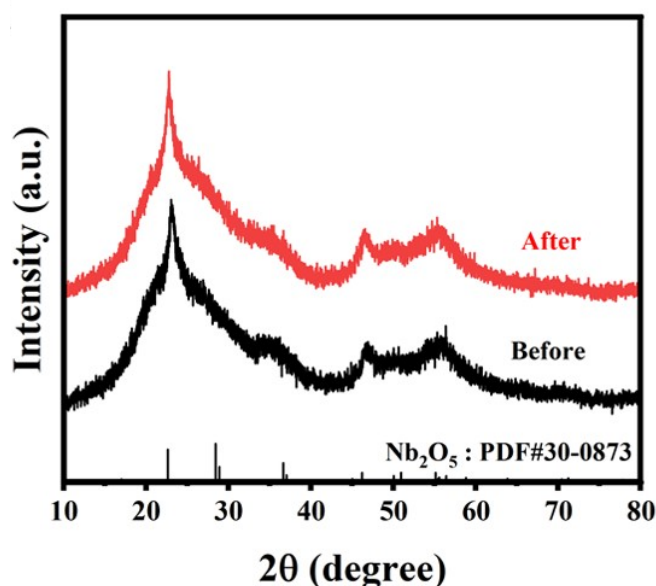

**Fig. S13.** XRD patterns of the  $\text{Ru-Nb}_2\text{O}_{5-x}$  before and after photocatalysis.

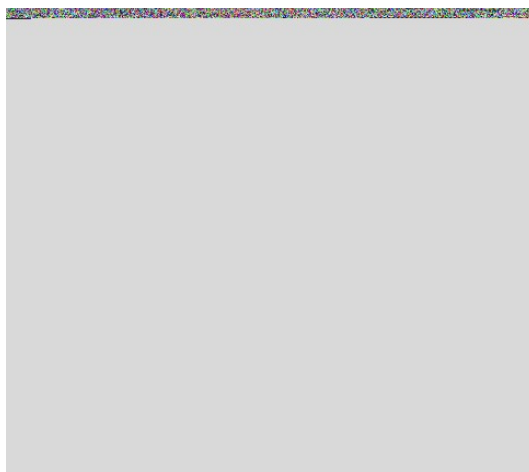

Fig. S14. SEM image of the Ru-Nb<sub>2</sub>O<sub>5-x</sub> after photocatalysis.

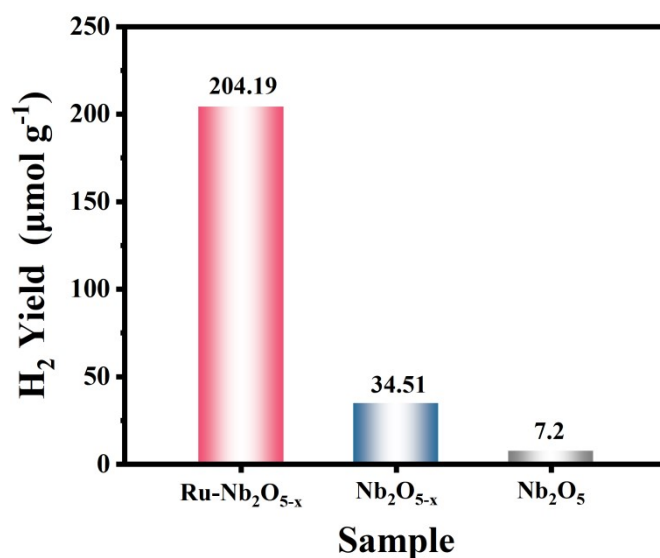

Fig. S15. The photocatalytic water splitting performance for Ru-Nb<sub>2</sub>O<sub>5-x</sub>, Nb<sub>2</sub>O<sub>5-x</sub> and Nb<sub>2</sub>O<sub>5</sub>.

The introduction of metallic Ru substantially improved the photocatalytic water-splitting efficiency, with Ru-Nb<sub>2</sub>O<sub>5-x</sub> achieving an H<sub>2</sub> evolution of 204.19 μmol g<sup>-1</sup>, far surpassing that of Nb<sub>2</sub>O<sub>5-x</sub> (34.51 μmol g<sup>-1</sup>). The result indicates that Ru is essential for facilitating the processes of water activation and dissociation.

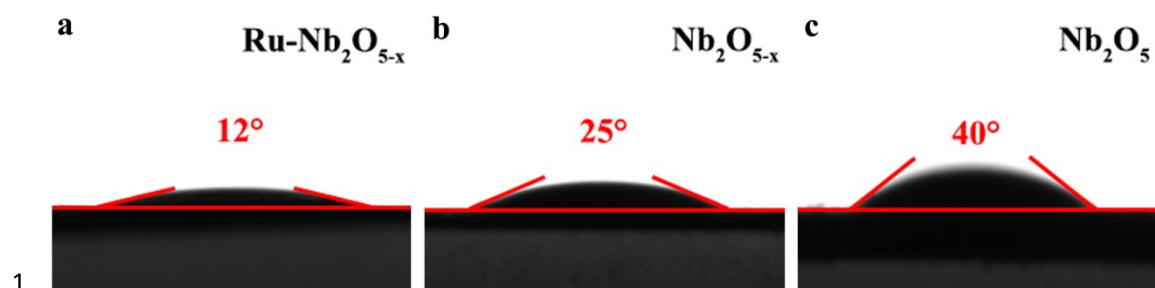

Fig. S16. Contact angle of (a)  $\text{Ru-Nb}_2\text{O}_{5-x}$ , (b)  $\text{Nb}_2\text{O}_{5-x}$  and (c)  $\text{Nb}_2\text{O}_5$ .



1 **Table S1.** Ru content in the different catalysts was determined by inductively coupled  
2 plasma optical emission spectrometry (ICP-OES).

| 3 | Sample                                 | Ru (mg L <sup>-1</sup> ) | Ru content (wt%) |
|---|----------------------------------------|--------------------------|------------------|
| 4 | Ru-Nb <sub>2</sub> O <sub>5-x</sub> -1 | 0.167                    | 0.33             |
| 5 | Ru-Nb <sub>2</sub> O <sub>5-x</sub> -2 | 0.324                    | 0.65             |
| 6 | Ru-Nb <sub>2</sub> O <sub>5-x</sub>    | 0.512                    | 1.02             |
| 7 | Ru-Nb <sub>2</sub> O <sub>5-x</sub> -4 | 0.609                    | 1.22             |
| 8 |                                        |                          |                  |

9 5 mg sample was digested with HF until a clear solution was obtained. The resulting  
10 solution was quantitatively transferred to a 100 mL volumetric flask, diluted to the  
11 mark, and homogenized by ultrasonication.

12

**Table S2.** Comparison of the reaction conditions and performances with other catalysts for photocatalytic CO<sub>2</sub> reduction.

| Catalysts                                                       | Light source                             | Reaction condition                                                                                    | Products                                                                  | Activity (μmol g <sup>-1</sup> h <sup>-1</sup> ) | Reference        |
|-----------------------------------------------------------------|------------------------------------------|-------------------------------------------------------------------------------------------------------|---------------------------------------------------------------------------|--------------------------------------------------|------------------|
| <b>Ru-Nb<sub>2</sub>O<sub>5-x</sub></b>                         | <b>300 W Xe lamp</b>                     | <b>Soild-gas</b>                                                                                      | <b>CO, CH<sub>4</sub></b>                                                 | <b>165.9</b>                                     | <b>This work</b> |
| <b>Nb<sub>2</sub>O<sub>5-x</sub></b>                            | <b>300 W Xe lamp</b>                     | <b>Soild-gas</b>                                                                                      | <b>CO, CH<sub>4</sub></b>                                                 | <b>92.4</b>                                      | <b>This work</b> |
| <b>black Nb<sub>2</sub>O<sub>5-x</sub> NFs</b>                  | <b>300 W Xe lamp</b>                     | <b>Soild-liquid H<sub>2</sub>O</b>                                                                    | <b>CO, CH<sub>4</sub></b>                                                 | <b>10.59</b>                                     | <b>1</b>         |
| <b>V<sub>O</sub>-Nb<sub>2</sub>O<sub>5</sub> nanosheets</b>     | <b>300 W Xe lamp</b>                     | <b>Soild-gas</b>                                                                                      | <b>CO, CH<sub>4</sub></b>                                                 | <b>4.30</b>                                      | <b>2</b>         |
| <b>Pd-Nb<sub>2</sub>O<sub>5</sub> nanosheets</b>                | <b>300 W Xe lamp</b>                     | <b>Soild-gas</b>                                                                                      | <b>CO, CH<sub>4</sub>, C<sub>2</sub>H<sub>4</sub>, CH<sub>3</sub>COOH</b> | <b>13.2</b>                                      | <b>3</b>         |
| <b>V<sub>Nb-O</sub> NA</b>                                      | <b>300 W Xe lamp</b>                     | <b>Soild-liquid H<sub>2</sub>O</b>                                                                    | <b>CO</b>                                                                 | <b>43.9</b>                                      | <b>4</b>         |
| <b>Ag-20@Nb<sub>2</sub>O<sub>5-x</sub></b>                      | <b>300 W Xe lamp (420 nm cut filter)</b> | <b>Soild-liquid H<sub>2</sub>O+NaHCO<sub>3</sub>+ Ru(bpy)<sub>3</sub><sup>2+</sup>+ ascorbic acid</b> | <b>CO, CH<sub>4</sub></b>                                                 | <b>5.913</b>                                     | <b>5</b>         |
| <b>NB@CN (1:5)</b>                                              | <b>5 W white LED light</b>               | <b>Soild-liquid H<sub>2</sub>O+NaHCO<sub>3</sub>+ Ru(bpy)<sub>3</sub><sup>2+</sup>+ ascorbic acid</b> | <b>CO, CH<sub>4</sub></b>                                                 | <b>0.155</b>                                     | <b>6</b>         |
| <b>V<sub>O,N</sub>-NBCN</b>                                     | <b>300 W Xe lamp (420 nm cut filter)</b> | <b>Soild-liquid H<sub>2</sub>O+TEOA</b>                                                               | <b>CO, CH<sub>4</sub></b>                                                 | <b>0.89</b>                                      | <b>7</b>         |
| <b>Nb<sub>2</sub>O<sub>5</sub>/W<sub>18</sub>O<sub>49</sub></b> | <b>300 W Xe lamp</b>                     | <b>Soild-gas</b>                                                                                      | <b>CO</b>                                                                 | <b>40.15</b>                                     | <b>8</b>         |
| <b>Nb<sub>2</sub>O<sub>5</sub>-0.5%Cu</b>                       | <b>300 W Xe lamp</b>                     | <b>Soild-liquid H<sub>2</sub>O</b>                                                                    | <b>CO, CH<sub>4</sub></b>                                                 | <b>2.84</b>                                      | <b>9</b>         |
| <b>HBNO</b>                                                     | <b>300 W Xe lamp</b>                     | <b>Soild-gas</b>                                                                                      | <b>CO, CH<sub>4</sub></b>                                                 | <b>5.28</b>                                      | <b>10</b>        |
| <b>Nb-BBN120</b>                                                | <b>300 W Xe lamp</b>                     | <b>Soild-gas</b>                                                                                      | <b>CO, C<sub>2</sub>H<sub>4</sub></b>                                     | <b>2.8</b>                                       | <b>11</b>        |
| <b>1ANbO</b>                                                    | <b>UV-light</b>                          | <b>Soild-gas</b>                                                                                      | <b>CO, CH<sub>4</sub></b>                                                 | <b>66.5</b>                                      | <b>12</b>        |
| <b>Bi<sub>3</sub>TiNbO<sub>9</sub> nanosheets with OVs</b>      | <b>300 W Xe lamp</b>                     | <b>Soild-gas</b>                                                                                      | <b>CO</b>                                                                 | <b>20.91</b>                                     | <b>13</b>        |

|                                                                      |                                      |                                                    |                     |       |    |
|----------------------------------------------------------------------|--------------------------------------|----------------------------------------------------|---------------------|-------|----|
| Oxygen-vacancies<br>tuned Bi <sub>2</sub> MoO <sub>6</sub>           | 300 W Xe<br>lamp                     | Soild-gas                                          | CO                  | 1.7   | 14 |
| WO <sub>3</sub> -C-OV                                                | 300 W Xe<br>lamp (AM<br>1.5G filter) | Soild-gas                                          | CO, CH <sub>4</sub> | 23.2  | 15 |
| Oxygen-vacancies<br>tuned BiOIO <sub>3</sub><br>single crystals      | 300 W Xe<br>lamp                     | Soild-gas                                          | CO                  | 17.33 | 16 |
| Co single atoms/<br>oxygen-doped<br>boron nitride                    | 300 W Xe<br>lamp                     | Soild-liquid<br>H <sub>2</sub> O+TEOA              | CO                  | 32    | 17 |
| Vo-R Bi <sub>24</sub> O <sub>31</sub> Br <sub>10</sub><br>nanosheets | 300 W Xe<br>lamp                     | Soild-liquid<br>H <sub>2</sub> O                   | CO                  | 14.8  | 18 |
| BiOBr-1                                                              | 300 W Xe<br>lamp                     | Soild-gas                                          | CO, CH <sub>4</sub> | 71.23 | 19 |
| Ag/BiOCl-OV NFs                                                      | 300 W Xe<br>lamp                     | Soild-gas                                          | CO, CH <sub>4</sub> | 76    | 20 |
| Sur-V <sub>0</sub> -BWO                                              | 300 W Xe<br>lamp                     | Soild-gas                                          | CO, CH <sub>4</sub> | 18.73 | 21 |
| BiO <sub>1-x</sub> Cl- OH                                            | 300 W Xe<br>lamp                     | Soild-liquid<br>H <sub>2</sub> O+CoCl <sub>2</sub> | CO, CH <sub>4</sub> | 1.8   | 22 |
| BIO-LOV2                                                             | 300 W Xe<br>lamp                     | Soild-gas                                          | CO, CH <sub>4</sub> | 17.33 | 23 |
| DUC PBOC-0.5                                                         | 300 W Xe<br>lamp                     | Soild-gas                                          | CO, CH <sub>4</sub> | 16.02 | 24 |

1 **Table S3.** The possible reaction path for the catalytic system of Nb<sub>2</sub>O<sub>5-x</sub> and Ru-Nb<sub>2</sub>O<sub>5-</sub>  
2 <sub>x</sub> samples.

|                                                                                                                      |     |
|----------------------------------------------------------------------------------------------------------------------|-----|
| $\text{CO}_2 + \text{e}^- + \text{H}^+ \rightarrow \text{COOH}^*$                                                    | (1) |
| $\text{COOH}^* + \text{e}^- + \text{H}^+ \rightarrow \text{CO}^* + \text{H}_2\text{O}$                               | (2) |
| $\text{CO}^* \rightarrow \text{CO} \uparrow + *$ or $\text{CO}^* + \text{e}^- + \text{H}^+ \rightarrow \text{CHO}^*$ | (3) |
| $\text{CHO}^* + \text{e}^- + \text{H}^+ \rightarrow \text{CH}_2\text{O}^*$                                           | (4) |
| $\text{CH}_2\text{O}^* + \text{e}^- + \text{H}^+ \rightarrow \text{CH}_3\text{O}^*$                                  | (5) |
| $\text{CH}_3\text{O}^* + \text{e}^- + \text{H}^+ \rightarrow \text{CH}_4 \uparrow + \text{O}^*$                      | (6) |

3

## 1 Reference

- [1] Lin, X.; Xia, S. H.; Zhang, L.; Zhang, Y. Y.; Sun, S. M.; Chen, Y. H.; Chen, S.; Ding, B.; Yu, Ji. Y.; Yan, J. H. Fabrication of Flexible Mesoporous Black Nb<sub>2</sub>O<sub>5</sub> Nanofiber Films for Visible-Light-Driven Photocatalytic CO<sub>2</sub> Reduction into CH<sub>4</sub>. *Adv. Mater.* **2022**, 34, 2200756.
- [2] Wu, J. C.; Zhu, J. C.; Fan, W. Y.; He, D. P.; Hu, Q. Y.; Zhu, S.; Yan, W. S.; Hu, J.; Zhu, J. F.; Chen, Q. X.; Jiao, X. C.; Xie, Y. Selective Photoreduction of CO<sub>2</sub> to CH<sub>4</sub> Triggered by Metal-Vacancy Pair Sites. *Nano Lett.* **2024**, 24, 696-702.
- [3] Ding, J. Y.; Du, P. J.; Li, P. P.; Liu, W. X.; Xu, J. Q.; Yan, W. S.; Pan, Y.; Hu, J.; Zhu, J. F.; Chen, Q. X.; Jiao, X. C.; Xie, Y. Highly Active Photoreduction of Atmospheric-Concentration CO<sub>2</sub> into CH<sub>3</sub>COOH over Palladium Particles on Nb<sub>2</sub>O<sub>5</sub> Nanosheets. *Angew. Chem. Int. Ed.* **2025**, 64, e202414453.
- [4] Di, J.; Chen, C.; Wu, Y.; Chen, H.; Xiong, J.; Long, R.; Li, S. Z.; Song, L.; Jiang, W.; Liu, Z. Asymmetric Electron Redistribution in Niobic-Oxygen Vacancy Associates to Tune Non-Covalent Interaction in CO<sub>2</sub> Photoreduction. *Adv. Mater.* **2024**, 36, 2401914.
- [5] Jiang, J. W.; Wang, X. F.; Guo, H. Enhanced Interfacial Charge Transfer/Separation By LSPR-Induced Defective Semiconductor Toward High CO<sub>2</sub>RR Performance. *Small.* **2023**, 19, 2301280.
- [6] Wang, X. F., Jiang, J. W.; Wang, L. L.; Guo, H. Efficient Nb<sub>2</sub>O<sub>5</sub>@g-C<sub>3</sub>N<sub>4</sub> heterostructures for enhanced photocatalytic CO<sub>2</sub> reduction with highly selective conversion to CH<sub>4</sub>. *Inorg. Chem. Front.* **2024**, 11, 123.
- [7] Jiang, J. W.; Wang, X. F.; Xu, Q. J.; Mei, Z. Y.; Duan, L. Y.; Guo, H. Understanding dual-vacancy heterojunction for boosting photocatalytic CO<sub>2</sub> reduction with highly selective conversion to CH<sub>4</sub>. *Appl. Catal. B: Environ.* **2022**, 316, 121679.
- [8] Wang, Y. X.; Tao, R.; Mu, Y. Q.; Piao, T. Y.; Li, J. L.; M, Y.; F, X. X.; Y, Q. Z. Enhanced solid-gas-phase carbon dioxide photoreduction efficiency through in-situ growth of W<sub>18</sub>O<sub>49</sub> on one-dimensional Nb<sub>2</sub>O<sub>5</sub> nanofibers for forming ell-connected S-scheme heterojunction. *Fuel.* **2025**, 386, 134287.
- [9] Chen, J. L.; Wang, T.; Yang, Z. Q.; Gao, P. Cu-modified Nb<sub>2</sub>O<sub>5</sub> photocatalysts for high performance of CO<sub>2</sub> reduction. *Mater. Res. Bull.* **2025**, 184, 113288.
- [10] Su, F. Y.; Wang, Z. S.; Tian, M. Z.; Liu, K. C.; Xie, H. Q.; Tu, W. G.; Zhang, Y. Z.; Li, X.; Jin, X. L.; Kong, X. Y. Constructing a crystalline-amorphous hydrated niobium pentoxide homojunction for superior photocatalytic CO<sub>2</sub> reduction into CH<sub>4</sub> with high selectivity. *Sci. Technol.* **2023**, 13, 5048-5057.
- [11] J'essica A, O.; Juliana A, T.; Renato V, G.; Caue, R.; Francisco G. E, N.; Luís A.M, R. Photocatalytic CO<sub>2</sub> reduction over Nb<sub>2</sub>O<sub>5</sub>/basic bismuth nitrate nanocomposites. *Mater. Res. Bull.* **2021**, 133, 111073.
- [12] Zeng, M.; Wu, Y. T.; Wang, Y.; Zhang, Z. Z.; Fu, X. Z.; Dai, W. X. Silver nanoparticle-enhanced photocatalytic CO<sub>2</sub> reduction over Ag/Nb<sub>2</sub>O<sub>5</sub> under UV-vis light irradiation. *Appl. Catal. A.* **2023**, 666, 119412.
- [14] Yu, H. J.; Chen, F.; Li, X. W.; Huang, H. W.; Zhang, Q. Y.; Su, S. Q.; Wang, K. Y.; Mao, E. Y.; Mei, Bastian.; Mul, G. D.; Ma, T. Y.; Zhang, Y. H. Synergy of

1 ferroelectric polarization and oxygen vacancy to promote CO<sub>2</sub> photoreduction. *Nat.*  
2 *Commun.* **2021**, 12, 4594.

3 [14] Zhang, Y. Z.; Zhi, X.; Harmer, J. R.; Xu, H. L.; Davey, K.; Ran, J. R.; Qiao, S. Z.  
4 Facet-specific Active Surface Regulation of Bi<sub>x</sub>MO<sub>y</sub> (M= Mo, V, W) Nanosheets for  
5 Boosted Photocatalytic CO<sub>2</sub> reduction. *Angew. Chem. Int. Ed.* **2022**, 61, e202212355.

6 [15] Lei, B.; Cui, W.; Chen, P.; Chen, L. C.; Li, J. Y.; Dong, A. C-Doping Induced  
7 Oxygen-Vacancy in WO<sub>3</sub> Nanosheets for CO<sub>2</sub> Activation and photoreduction. *ACS*  
8 *Catal.* **2022**, 12, 9670-9678.

9 [16] Chen, F.; Ma, Z. Y.; Ye, L. Q.; Ma, T. Y.; Zhang, T. R.; Zhang, Y. H.; Huang, H.  
10 W. Macroscopic Spontaneous Polarization and Surface Oxygen Vacancies  
11 Collaboratively Boosting CO<sub>2</sub> Photoreduction on BiOIO<sub>3</sub> Single Crystals. *Adv. Mater.*  
12 **2020**, 32, 1908350.

13 [17] Liang, J. L.; Zhang, H. B.; Song, Q. Q.; Liu, Z. Y.; Xia, J.; Yan, B. H.; Meng, X.  
14 M.; Jiang, Z. F.; Lou, X. W.; Lee, C. S. Modulating Charge Separation of Oxygen-  
15 Doped Boron Nitride with Isolated Co Atoms for Enhancing CO<sub>2</sub>-to-CO  
16 Photoreduction. *Adv. Mater.* **2024**, 36, 2303287.

17 [18] Li, J. W.; Sun, X. R.; Duan, Y. Q.; Ma, J. J.; He, C. Z.; Li, S. J. Oxygen vacancy-  
18 engineered ultrathin Bi<sub>24</sub>O<sub>31</sub>Br<sub>10</sub> for visible light-driven CO<sub>2</sub> reduction with nearly  
19 100% CO selectivity in pure water. *Chem. Eng. J.* **2023**, 473, 145383.

20 [19] Xie, J.; Lu, Z. J.; Feng, Y.; Huang, J. G.; Hu, J. D.; Hao, A. Z.; Cao, Y. L. A  
21 small organic molecule strategy for remedying oxygen vacancies by bismuth defects  
22 in BiOBr nanosheet with excellent photocatalytic CO<sub>2</sub> reduction. *Nano Res.* **2024**, 17,  
23 297-306.

24 [20] Wang, F.; Guo, J. C.; Han, L. H.; Shen, H. X.; Zhu, L. L.; Chen, S. Oxygen  
25 vacancy-engineered BiOCl nanoflake with silver decoration for enhanced  
26 photocatalytic CO<sub>2</sub> reduction at solid-gas interface. *Chem. Eng. J.* **2023**, 478, 147365.

27 [21] Liu, H. H.; Chen, Y. X.; Wang, W. T.; He, X. Y.; He, Z. X.; Li, L.; Zeng, S. Y.;  
28 Cao, R. G.; Zhang, G. Q. *In situ* solvothermal reduction engineering enables delicate  
29 control over surface-rich oxygen vacancies on Bi<sub>2</sub>WO<sub>6</sub> for highly efficient  
30 photocatalytic CO<sub>2</sub> reduction. *EES Catal.* **2023**, 1, 495.

31 [22] Sun, H. Y.; Lin, H. L.; Jia, X. M.; Li, X. Y.; Li, S.; Jin, X.; Wang, Q. L.; Chen, S.  
32 F.; Cao, J. Dual structure cobalt sites on surface hydroxyl and oxygen vacancy of BiOCl  
33 for cooperative CO<sub>2</sub> reduction and tetracycline oxidation. *Appl. Catal. B: Environ.*  
34 **2024**, 359, 124514.

35 [23] Chen, F.; Ma, Z. Y.; Ye, L. Q.; Ma, T. Y.; Zhang, T. R.; Zhang, Y. H.; Huang, H.  
36 W. Macroscopic Spontaneous Polarization and Surface Oxygen Vacancies  
37 Collaboratively Boosting CO<sub>2</sub> Photoreduction on BiOIO<sub>3</sub> Single Crystals. *Adv. Mater.*  
38 **2020**, 32, 1908350.

39 [24] Wang, B.; Zhang, W.; Liu, G. P.; Chen, H. L.; Weng, Y. X.; Li, H. M.; Chu, P. K.;  
40 Xia, J. X. Excited Electron-Rich Bi<sub>(3-x)</sub><sup>+</sup> Sites: A Quantum Well-Like Structure for  
41 Highly Promoted Selective Photocatalytic CO<sub>2</sub> Reduction Performance. *Adv. Funct.*  
42 *Mater.* **2022**, 32, 2202885.
